# Supplementary material for: Using barometric time series of the IMS infrasound network for a global analysis of thermally induced atmospheric tides
Source: Copernicus journal article supplement (doi:10.5194/amt-2017-465), 2017-12-22
Supplement: Supplementary file [file amt-2017-465-AC2-supplement.zip]

**Authors' response to Referee #2 comment on the manuscript #amt-2017-465 (Hupe et al.)**

Referee #2:

This paper provides a nice analysis of barometric data from the International Monitoring System infrasound network as a means to explore atmospheric tides. The paper is well written and the analysis, and comparisons with MERRA, provide an interesting and new set of observations.

My only suggestion to the authors would be to provide some more detail on the novelty of this dataset in comparison with other barometric datasets available. As an infrasound specialist, I am aware of the uniqueness of the microbarometer recordings, but the novelty of the absolute pressure recordings in comparison to what other datasets exists is not immediately apparent to me. Perhaps more discussion on other datasets that provide this data would be useful.

Authors' response:

Dear referee,

thank you for taking your time for the positive review. We have added a short discussion on other (global) barometric data sets (including additional references) in section 2 of our paper. In the added paragraph, we refer to the Global Observing System of the WMO and point out the beneficial features of the IMS infrasound network for studying atmospheric dynamics.

Changes in the manuscript:

*A marked-up manuscript version is uploaded as a supplement to this response.*
